# Supplementary material
Source: HighWire-hosted journal article supplement (https://bmjopen.bmj.com/content/11/12/e054039)
Supplement: inline-supplementary-material-2 [file inline-supplementary-material-2.pdf]

## Appendix 2

### Comparison of observed prevalence with those of the Rwandan general population in 2018

The table below shows that the prevalence observed in high-risk individuals is higher and far away from that of the general population (the difference was not tested statistically)

*Table 1 An overview of CHB among the general population, oHRGs and prisoners*

| Name of the province | General population <sup>§</sup> 10-64 years, %(95% CIs) | oHRG, age range 15-117 years, 2017 %(95% CIs) | Prisoners, age range 15-112 years, 2017 %(95% CIs) |
|----------------------|---------------------------------------------------------|-----------------------------------------------|----------------------------------------------------|
| City of Kigali       | 1.8 (0.6-3.1)                                           | 3.8 (3.6-4.2)                                 | <b>16.5</b> (13.7-19.7)                            |
| South                | 0.5 (0.0-1.2)                                           | 2.8 (2.6-3.0)                                 | 3.9 (3.6-4.1)                                      |
| West                 | 2.2 (1.1-3.4)                                           | 4.1 (3.9-4.2)                                 | <b>5.2</b> (4.7-5.7)                               |
| North                | 0.8 (0.1-1.6)                                           | <b>5.1</b> (3.9-4.2)                          | no data                                            |
| East                 | 2.6 (1.0-4.3)                                           | <b>4.6</b> (4.4-4.9)                          | 4.7 (4.4-5.0)                                      |

<sup>§</sup>Rwanda Population Based HIV Impact Assessment (RPHIA), 2018-2019
